# Supplementary material
Source: PubMed Central journal article supplement (PMC8232016)
Supplement: NIHMS1710996-supplement-fS1.pdf [file NIHMS1710996-supplement-fS1.pdf]

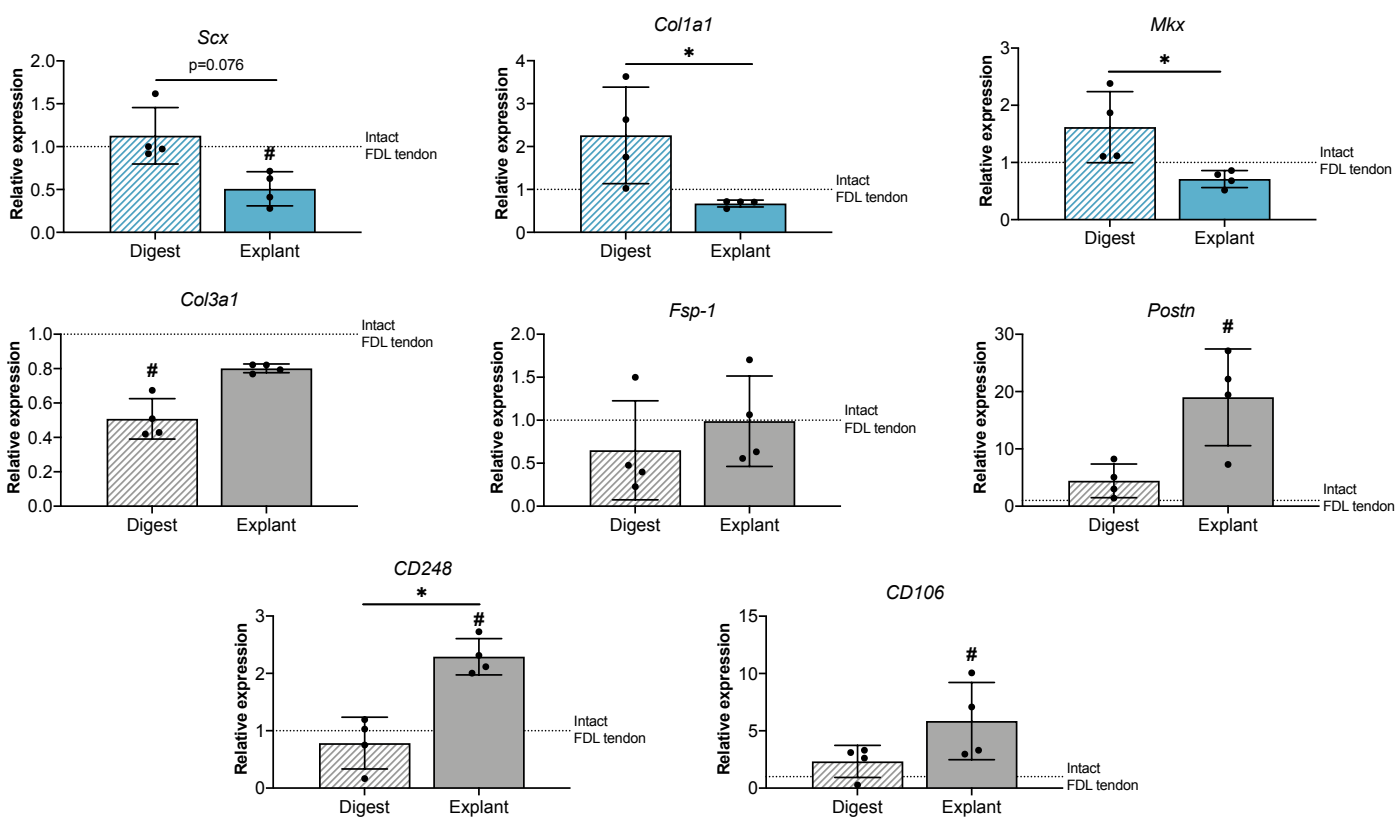

**Supplemental Figure S1:** Expression of tendon-related (blue) and activation marker (gray) genes in isolated cells at passage 1 shown relative to intact FDL tendon (dotted line). \* $p < 0.05$  between isolation methods, # $p < 0.05$  compared to intact FDL tendon,  $n = 4$ .
