# Supplementary material
Source: PubMed Central journal article supplement (PMC8232016)
Supplement: NIHMS1710996-supplement-fS2.pdf [file NIHMS1710996-supplement-fS2.pdf]

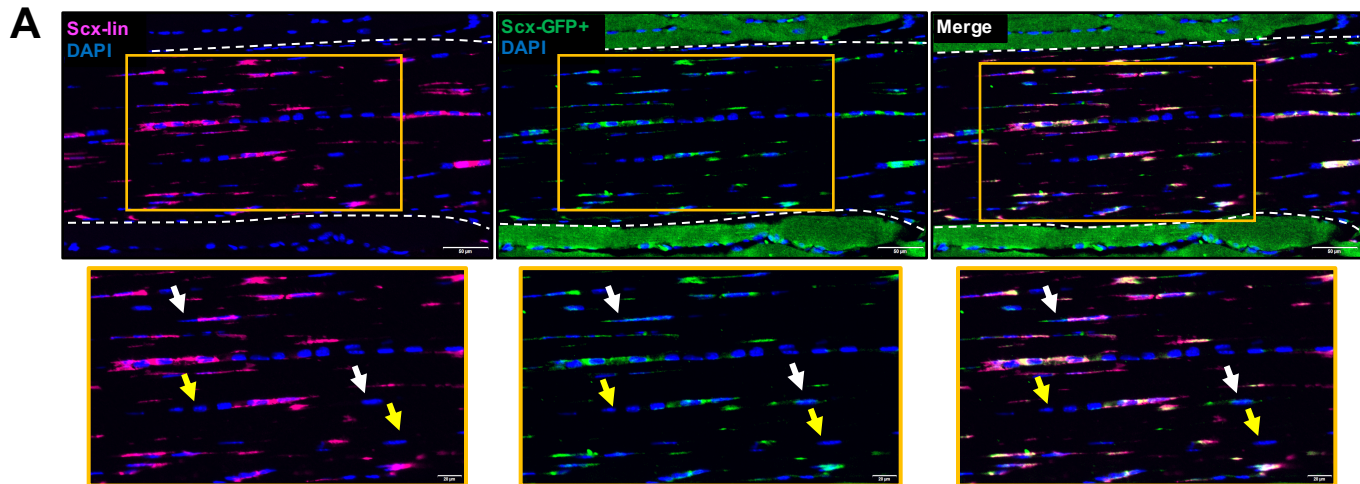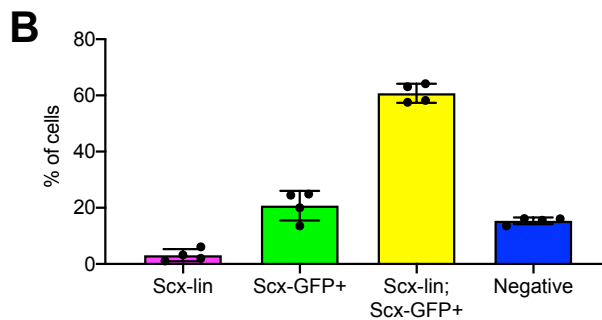

**Supplemental Figure S2:** Representative images (**A**) and quantification (**B**) of FDL tendon cell populations (Scx-lin<sup>+</sup> [pink], Scx-GFP<sup>+</sup> [green], Scx-lin<sup>+</sup>;Scx-GFP<sup>+</sup> [yellow], negative [blue]) labeled by the *Scx;Ai9;GFP* mouse. White arrows indicate tendon cells that are Scx-GFP<sup>+</sup> but not Scx-lin. Yellow arrows indicate cells that are neither Scx-lin<sup>+</sup> nor Scx-GFP<sup>+</sup> (negative cells). Scale bars = 50  $\mu$ m (top row), 20  $\mu$ m (bottom row). n=4.
